# Supplementary material for: Dose-Dependent Blood-Feeding Activity and Ovarian Alterations to PM2.5 in Aedes aegypti
Source: MDPI journal article supplement (doi:10.3390/insects12100948), 2021-10-18
Supplement: s1 [file s1]

Supplementary data

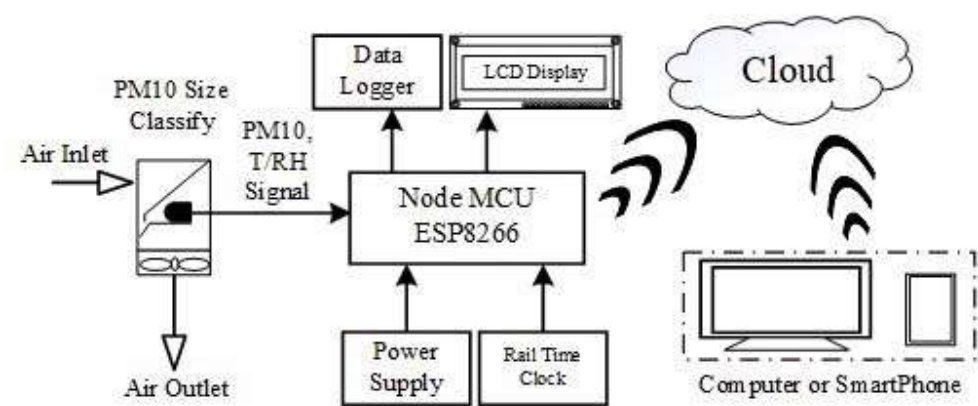

Figure S1. Operating Principle of DustBoy. Microcontroller unit; LCD liquid crystal display / RH&T Relative humidity & Temperature / RTC real time clock [27].

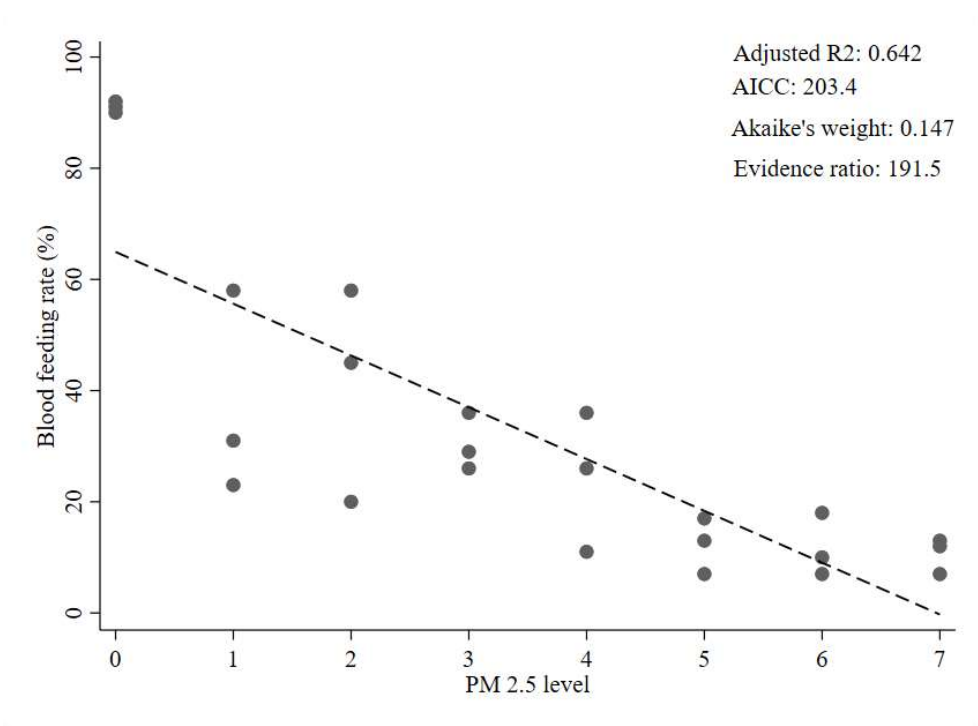

Figure S2. Linear model of the dose-response relationship between PM<sub>2.5</sub> level and blood-feeding rate in female *Ae.aegypti* mosquitoes

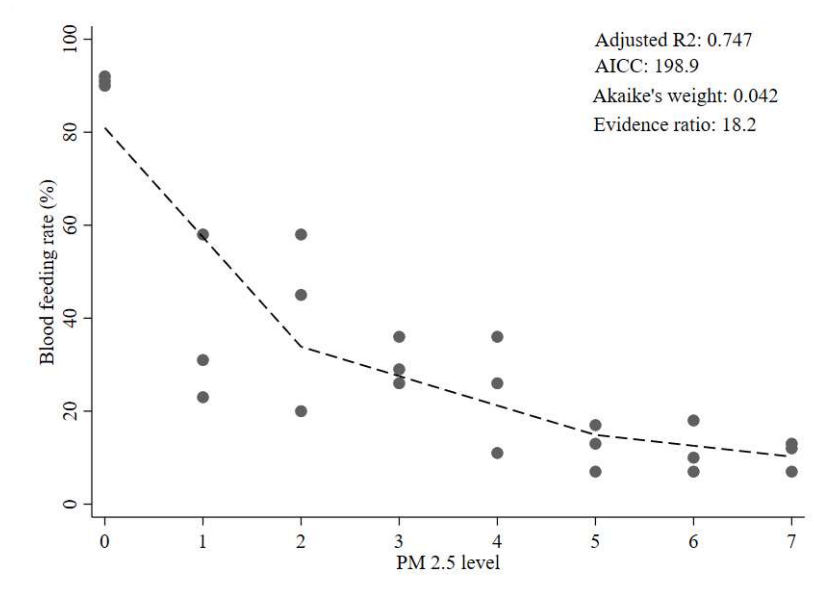

Figure S3. Three-segment piecewise linear of the dose-response relationship between PM<sub>2.5</sub> level and blood-feeding rate in female *Ae. aegypti* mosquitoes

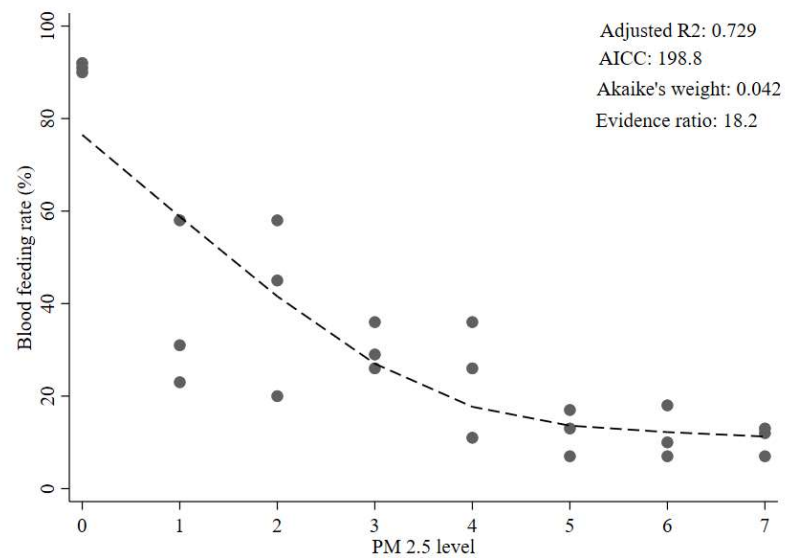

Figure S4. Three-knot restricted cubic spline model of the dose-response relationship between PM<sub>2.5</sub> level and blood-feeding rate in female *Ae. aegypti* mosquitoes

Table S1. Trace metal concentrations on the PM<sub>2.5</sub> filter paper

| Metals         | Concentration (mg/g) |
|----------------|----------------------|
| Iron (Fe)      | 0.513 ± 0.112        |
| Zinc (Zn)      | 0.087 ± 0.019        |
| Copper (Cu)    | 0.015 ± 0.003        |
| Manganese (Mn) | 0.010 ± 0.002        |
| Nickel (Ni)    | 0.015 ± 0.032        |
| Chromium (Cr)  | 0.080 ± 0.017        |
| Cadmium (Cd)   | 0.007 ± 0.002        |
| Lead (Pb)      | 0.075±0.009          |

Notes:- Concentration is presented as mean ± standard deviation
